# Supplementary material for: Design of ionic liquid-based polyelectrolytes by combining ‘nanostructurisation’ and ‘zwitterionisation’
Source: Royal Society of Chemistry journal article supplement (doi:10.1039/c5py01838b), 2015-12-28
Supplement: c5py01838b1.pdf [file c5py01838b1.pdf]

Electronic Supplementary Information for

## **Design of ionic liquid-based polyelectrolytes by combining 'nanostructurisation' and 'zwitterionisation'**

Takuro Matsumoto, Takahiro Ichikawa, and Hiroyuki Ohno\*

### **1. General procedures and materials**

**General procedures.**  $^1\text{H}$  NMR was obtained on a JNM-ECX400 and JNM-ECA500 (JEOL). Chemical shifts of  $^1\text{H}$  signals were quoted to tetramethylsilane or 3-(trimethylsilyl)-1-propanesulfonic acid sodium salt ( $\delta = 0.00$ ) as internal standard. Elemental analysis was carried out on an Elementar Analytical vario EL3. Polydispersity were determined by SEC systems composed of degassing unit DGU-20A, durable pump LC-20AD, column oven CTO-20AC, UV-vis detector SPD-20A, refractive index detector RID-20A (Shimadzu), and column Asaphipak GF-7M HQ (shodex). SEC measurement was performed at 40 °C using DMF containing 10 mM LiBr or THF as an eluent at a flow rate of 0.4 ml/min. A calibration curve was prepared using polystyrene standard. Small angle X-ray scattering (SAXS) profiles were obtained using a Smart Lab (Rigaku) with  $\text{CuK}\alpha$  radiation. Samples for transmission electron microscopy (TEM) were exposed to the vapor of 4 wt % of aqueous  $\text{OsO}_4$  for 20 min and sectioned using an FC7 cryomicrotome (Leica) at -120 °C using a glass knife at 70 nm thickness. Sections were placed on Cu grids. TEM micrographs were obtained by JEM-2100 (JEOL) operating at 200 kV. The thermal properties were examined by DSC-6220 and TG/DTA-7200 (Seiko Instruments). The heating and cooling rates were 10 °C  $\text{min}^{-1}$ . The ionic conductivity was measured with an impedance analyzer Solartron 1260 (Schlumberger). The heating rate was 2 °C  $\text{min}^{-1}$ . Raman spectroscopy measurement was performed using JASCO NRS-1000 spectrometer with a liquid  $\text{N}_2$ -cooled CCD detector and a Kaiser Optical holographic super-notch filter. For excitation, a Coherent Innova 90C Kr laser with a 20 mW beam at a 647.1 nm excitation wavelength was used.

**Materials.** All chemical reagents and solvents were obtained from commercial sources. Both styrene and 2-(dimethylamino)ethyl acrylate were distilled before use. AIBN was purified via recrystallisation. The other reagents were used without purification. All reactions were carried out in anhydrous solvents under an argon atmosphere.

## 2. Synthesis

### Synthesis of PS

Styrene (52.8 g, 0.507 mol) and 4-cyano-4-[(dodecylsulfanylthiocarbonyl)sulfanyl] pentanoic acid (0.526 g, 1.30 mmol) were charged into a 200 mL Schlenk flask and subjected to three freeze-pump-thaw cycles. After stirring at 100 °C for 10 h, it was placed into liquid nitrogen. The product was purified by reprecipitation procedures with methanol and vacuum dried. Yield: 7.36 g of yellow powder. SEC (DMF containing 10 mM LiBr, 40 °C):  $M_n = 3.39$  kg/mol,  $M_w/M_n = 1.57$  (against PS standards).  $^1\text{H}$  NMR spectrum was depicted in Fig. S1(a).

### Synthesis of PS-*b*-PDMA-64.3

PS (1.00 g, 0.294 mmol), 2-(dimethylamino)ethyl acrylate (8.02 g, 56.0 mmol), AIBN (3.37 mg, 0.0205 mmol) and DMF (10 ml) were charged into a 30 ml Schlenk flask and subjected to three freeze-pump-thaw cycles. After stirring at 65 °C for 24 h, it was placed into liquid nitrogen. The product was purified by reprecipitation procedures with hexane and vacuum dried. Yield: 2.34 g of yellow oil.  $M_n$  and  $M_w/M_n$  determined by the combination of  $^1\text{H}$  NMR and SEC measurement:  $M_n = 10.8$  kg/mol,  $M_w/M_n = 1.96$ . Elemental analysis. Calcd: C, 67.9; H, 8.74; N, 6.84. Found: C, 67.7; H, 8.96; N, 6.53.  $^1\text{H}$  NMR spectrum was depicted in Fig. S1(b).

### Synthesis of PS-*b*-PZI-64.3

1, 3-propane sultone (4.45 g, 0.0364 mol), PS-*b*-PDMA-64.3 (0.663 g, 0.0614 mmol) and DMF (40 mL) were charged into a 100 ml Schlenk flask, which was stirred at 80 °C for 24 h. The product was purified by reprecipitation procedures with methanol and vacuum dried. Yield: 0.657 g of yellow powder. Elemental analysis. Calcd for PS-*b*-PZI H<sub>2</sub>O per ZI unit: C, 51.0; H, 7.55; N, 4.09. Found: C, 49.5; H, 7.54; N, 3.93.  $^1\text{H}$  NMR spectrum was depicted in Fig. S1(c).

Table S1. Molecular characteristics of polymers.

| polymer                                         | $M_n$ (kg/mol) <sup>a</sup> | $M_w/M_n$ <sup>b</sup> |
|-------------------------------------------------|-----------------------------|------------------------|
| Initial PS for PS- <i>b</i> -PDMA-19.7          | 12.4                        | 1.32                   |
| PS- <i>b</i> -PDMA-19.7                         | 16.4                        | 1.36                   |
| Initial PS for PS- <i>b</i> -PDMA-44.1 and 64.3 | 3.39                        | 1.57                   |
| PS- <i>b</i> -PDMA-44.1                         | 6.64                        | -                      |
| PS- <i>b</i> -PDMA-64.3                         | 10.8                        | 1.96                   |

<sup>a</sup> Determined by  $^1\text{H}$  NMR measurement and  $M_n$  for the initial PS determined by SEC measurement.

<sup>b</sup> Determined by SEC measurement. -, not measured.

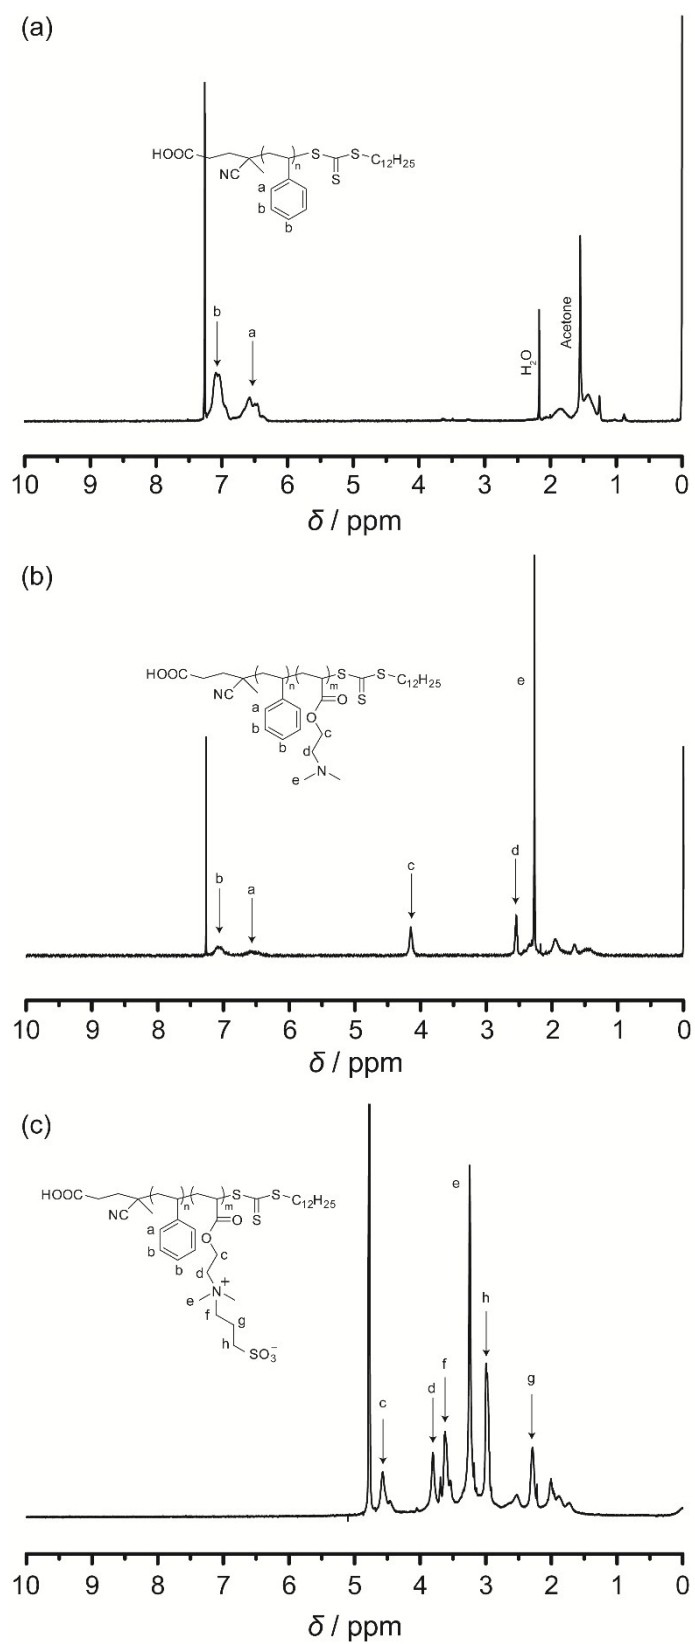

**Fig. S1** <sup>1</sup>H NMR spectra of (a) PS in CDCl<sub>3</sub>, (b) PS-*b*-PDMA-64.3 in CDCl<sub>3</sub> and PS-*b*-PZI-64.3 in D<sub>2</sub>O. Fig. S1(c) is the same as Fig. 1(a) in the paper.

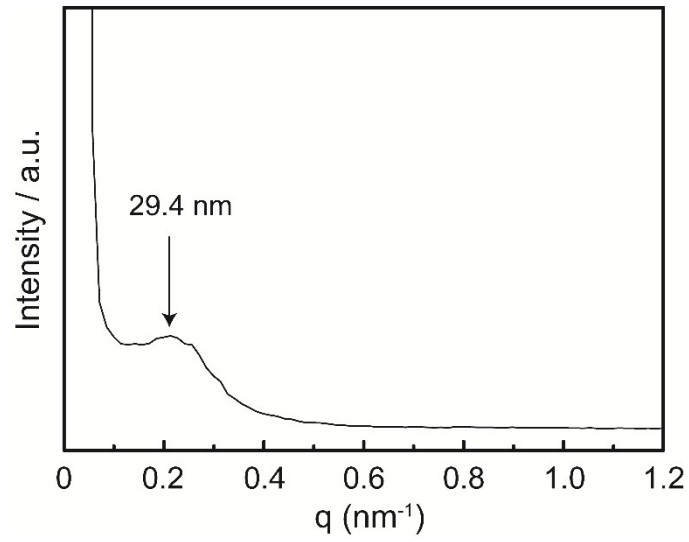

**Fig. S2** SAXS profile of PS-*b*-PZI-64.3.

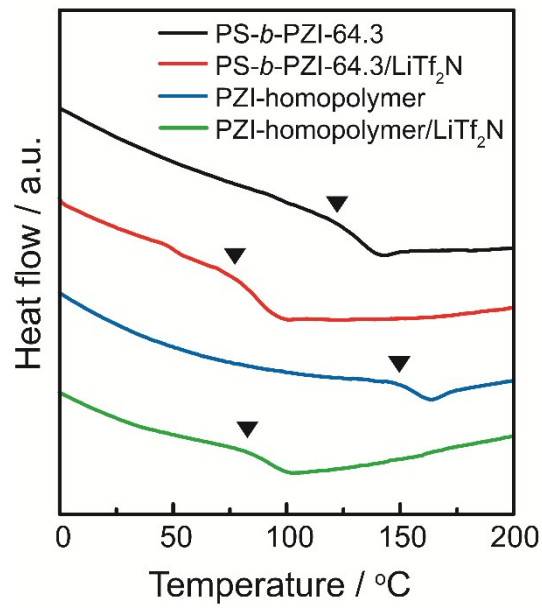

**Fig. S3** DSC thermograms of the obtained samples on heating. Filled markers denote  $T_g$ .

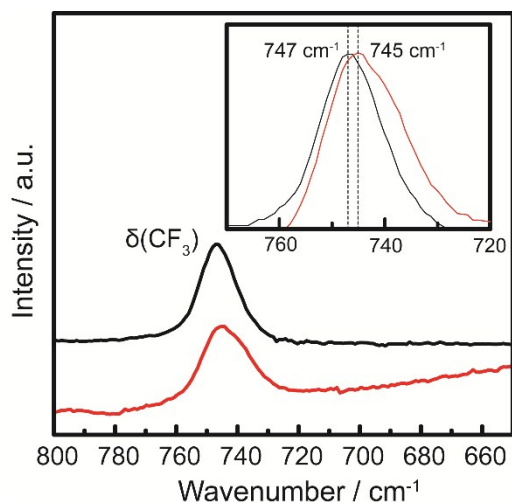

**Fig. S4** Raman spectra of LiTf<sub>2</sub>N (black) and PS-*b*-PZI-64.3/LiTf<sub>2</sub>N (red).

Raman spectroscopy measurement has been frequently used for understanding the ion state of ionic liquids.<sup>1</sup> PS-*b*-PZI-64.3/LiTf<sub>2</sub>N film showed a Raman band at 745 cm<sup>-1</sup>, which was assigned to the symmetric bending vibration of the CF<sub>3</sub> group ( $\delta_s(\text{CF}_3)$ ) of the Tf<sub>2</sub>N, while the corresponding peak for LiTf<sub>2</sub>N was observed at 747 cm<sup>-1</sup>. The difference would be attributed to the dissociation of LiTf<sub>2</sub>N in the PS-*b*-PZI-64.3/LiTf<sub>2</sub>N film.

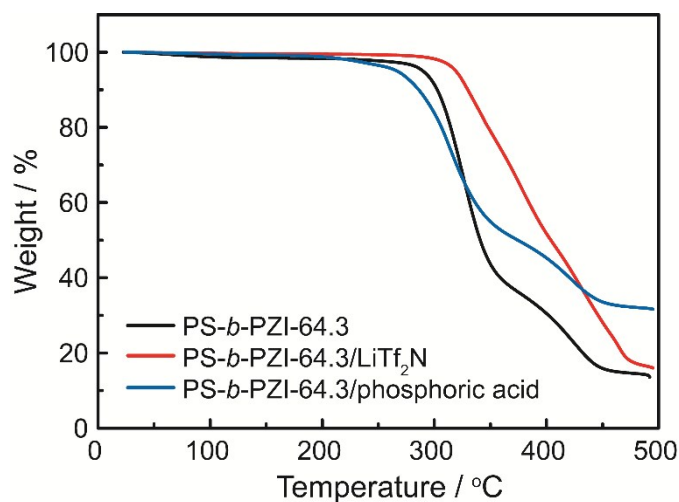

**Fig. S5** TG curves of PS-*b*-PZI-64.3, PS-*b*-PZI-64.3/LiTf<sub>2</sub>N and PS-*b*-PZI-64.3/phosphoric acid.

### 3. References

- (1) W. Ogihara, N. Suzuki, N. Nakamura and H. Ohno, *Polym. J.*, 2006, **38**, 117.
